# Supplementary material
Source: publisher figshare collection journal article supplement (https://diabetesjournals.figshare.com/articles/dataset/_/23935278)
Supplement: Supplementary file 1 [file 1]

### Trigger events for adjudication

1. All investigator-reported DKA events and selected investigator-reported terms indicative of DKA
2. All BHB readings (including e-diary data)  $>1.5$  and  $<3.8$  mmol/L and selected terms indicative of acetonemia plus
  - Reported symptoms suggestive of ketoacidosis, or
  - Accompanied by reports of hospitalization, or
  - Reported as a serious adverse event
3. Any BHB reading  $\geq 3.8$  mmol/L

### Parameters for adjudication

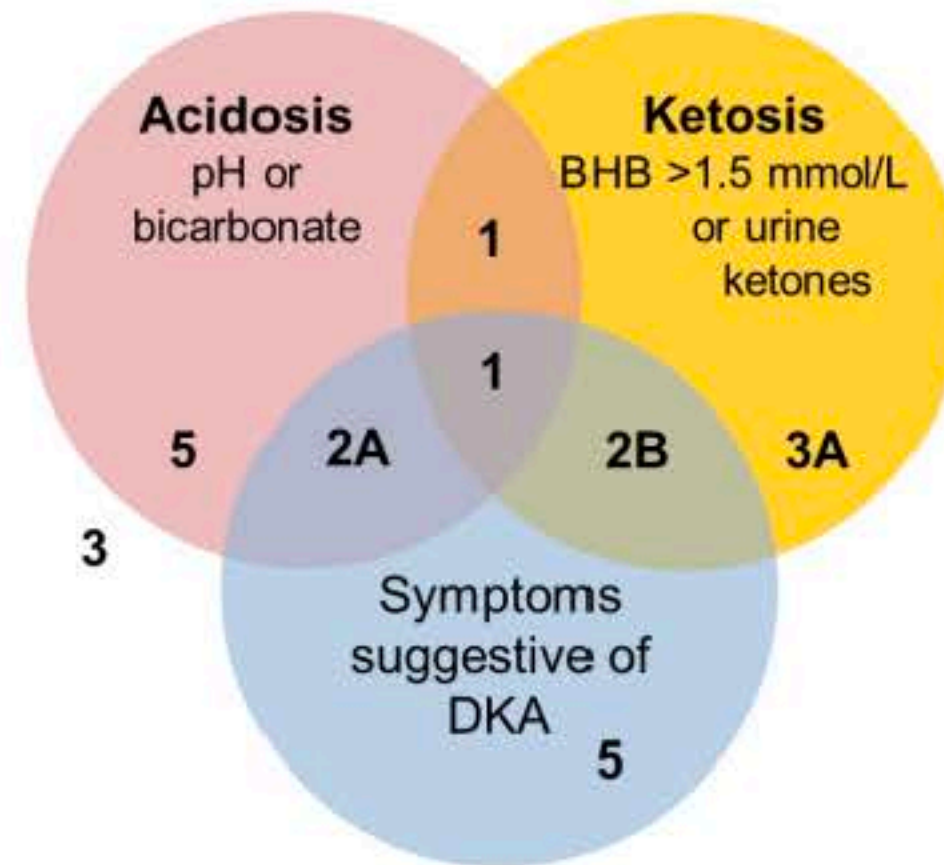

Case definitions for ketoacidosis adjudication were provided as guidance; final decision on case category based on adjudication committee judgment

### Case definitions

1. **Certain ketoacidosis:**
  - Confirmed ketosis plus confirmed acidosis (with or without symptoms)
2. **Potential ketoacidosis:**
  - A. Confirmed acidosis plus symptoms suggestive of DKA
  - B. Confirmed ketosis plus symptoms suggestive of DKA\*
3. **Unlikely ketoacidosis:**
  - Evidence of absence of acidosis without ketosis
  - A. Unlikely ketoacidosis but ketosis:**
    - High ketones without acidosis and without symptoms
4. **Unclassifiable:**
  - Acidosis or symptoms only
